# Supplementary material for: Molecular Typing Reveals Distinct Mycoplasma genitalium Transmission Networks among a Cohort of Men Who Have Sex with Men and a Cohort of Women in France
Source: MDPI journal article supplement (doi:10.3390/microorganisms10081587), 2022-08-06
Supplement: s1 [file s1]

**Table S2.** Multivariate analysis for the most prevalent *mgpB* type distribution according to the sex and the macrolide resistance status.

| <b>ST2 <i>vs</i> variables</b>          | <b>Estimate (aOR)</b> | <b>95% CI</b> | <b>P-value</b> |
|-----------------------------------------|-----------------------|---------------|----------------|
| Sex (male)                              | 0.42                  | 0.11-1.56     | 0.19           |
| Macrolide resistance status (resistant) | 1.53                  | 0.66-3.58     | 0.32           |

  

| <b>ST4 <i>vs</i> variables</b>          | <b>Estimate (aOR)</b> | <b>95% CI</b> | <b>P-value</b> |
|-----------------------------------------|-----------------------|---------------|----------------|
| Sex (male)                              | 2.39                  | 0.84-6.84     | 0.10           |
| Macrolide resistance status (resistant) | 2.23                  | 0.91-5.45     | 0.08           |

  

| <b>ST7 <i>vs</i> variables</b>          | <b>Estimate (aOR)</b> | <b>95% CI</b> | <b>P-value</b> |
|-----------------------------------------|-----------------------|---------------|----------------|
| Sex (male)                              | 0.29                  | 0.08-1.11     | 0.07           |
| Macrolide resistance status (resistant) | 1.01                  | 0.42-2.43     | 0.98           |

aOR: adjusted odds ratio; 95% CI: 95% confidence interval.
